# Supplementary material for: A novel histone acetylation-associated gene signature with prognostic value in Ewing Sarcoma
Source: Research Square preprint supplement (doi:10.21203/rs.3.rs-3974842/v1), 2024-03-05
Supplement: Supplementary file 1 [file 565740ee62e9d8cc37d2886e.xlsx]

## Sheet: Supplemental Table S1
	Gene name
1	RUVBL2
2	ARID5A
3	PPARGC1A
4	KAT7
5	PAXIP1
6	WBP2
7	AUTS2
8	GATA3
9	KAT2A
10	BRD7
11	IL1B
12	ISL1
13	LIF
14	ARRB1
15	SMAD4
16	MUC1
17	NAP1L2
18	NOS1
19	FOXP3
20	PIH1D1
21	PIWIL2
22	MAPK3
23	SPHK2
24	SNAI2
25	SMARCB1
26	BRCA1
27	TADA2A
28	GLYR1
29	RPS6KA4
30	RPS6KA5
31	TADA2B
32	CTBP1
33	SDR16C5
34	SIRT1
35	SIN3A
36	ZNF451
37	NOC2L
38	SET
39	SNCA
40	SPI1
41	TAF7
42	TWIST1
43	THAP7
44	ATG5
45	HDAC5
46	RAPGEF3
47	TADA3
48	TRIM16
49	TAF6L
50	WDR5
51	CHEK1
52	SGF29
53	TADA1
54	DR1
55	CRTC2
56	EP300
57	USP22
58	JADE2
59	KAT6B
60	BRD1
61	ZZZ3
62	TAF5L
63	BRPF3
64	IRF4
65	KMT2A
66	MYOD1
67	ING4
68	LEF1
69	MBIP
70	PER1
71	POLE3
72	YEATS2
73	ENY2
74	ATXN7L3
75	KAT14
76	PBXIP1
77	ATXN7
78	MEAF6
79	BRCA2
80	TAF2
81	TAF4
82	TAF5
83	TAF6
84	TAF9
85	TAF10
86	TAF12
87	MAP3K7
88	BRPF1
89	NAA60
90	KAT6A
91	JADE1
92	TRRAP
93	KAT8
94	ING5
95	SUPT3H
96	CAMK1
97	KAT2B
98	LDB1
99	MCM3AP
100	JADE3
101	SUPT7L
102	ZMPSTE24
103	MCRS1
104	KAT5
105	BRD8
106	MORF4L1
107	MSL3
108	ATF2
109	MSL3P1
110	CHD5
111	EPC2
112	KANSL1
113	HCFC1
114	APBB1
115	MSL1
116	PHF20
117	ACTL6B
118	ING3
119	MBTD1
120	KANSL2
121	MSL2
122	MRGBP
123	IWS1
124	KANSL3
125	DMAP1
126	EP400
127	BEND3
128	ACTB
129	VPS72
130	NAA40
131	NAA50
132	EPC1
133	YEATS4
134	OGT
135	HAT1
136	ACTL6A
137	RUVBL1
138	NCOA1
139	MORF4L2
140	BRD2
141	BRD3
142	BRD4
143	BRDT
144	CIITA
145	CLOCK
146	CREBBP
147	HDAC1
148	HDAC2
149	HDAC3
150	HDAC4
151	HDAC6
152	HDAC7
153	HDAC8
154	HDAC9
155	HDAC10
156	HDAC11
157	NCOA2
158	NCOA3
159	OGA
160	SIRT2
161	SIRT3
162	SIRT4
163	SIRT5
164	SIRT6
165	SIRT7
166	TAF1
